# Supplementary material for: Paternal inheritance of chloroplast and mitochondrial DNA in huon pine (Lagarostrobos franklinii).
Source: Research Square preprint supplement (doi:10.21203/rs.3.rs-8659228/v1), 2026-02-05
Supplement: Supplementary file 1 [file fc8ab984ec12c7a2e4992642.xlsx]

## Sheet: Tab_S1_markers
								Polymorphic position analysed by the marker
Marker name	Target genome	Name of forward primer	Sequence of forward primer	Name of reverse primer	Sequence of reverse primer	Size of PCR product (in bp)	Annealing temperature in PCR (°C)	Reference genome	Position in reference genome (in bp)	Type of variant	CDS including the variant	Neighbouring CDS
ptDNA_M1	ptDNA	ptDNA_M1_F	AGGAATGATCCCTCCCAATC	ptDNA_M1_R	AACAATTGGATCGGAAATCG	211	55	MW470983	8203	SNV		psbK (variant 5' of CDS)
ptDNA_M2	ptDNA	ptDNA_M2_F	GGAAAAGGGGATTCCTGAAG	ptDNA_M2_R	GGCATAAAACCATCCATTCTG	245	55	MW470983	113920	SNV	rpoC1
ptDNA_M2a	ptDNA	ptDNA_M2a_F	GGCTTATGAAGAGCTAGAATCG	ptDNA_M2a_R	TTTCATGCGTCTAACCAAAAA	166	55	MW470983	113920	SNV	rpoC1
ptDNA_M3	ptDNA	ptDNA_M3_F	AGTCGTTTGAATAGCGAGTTACA	ptDNA_M3_R	CATCAGGGCGAATAGTTACCA	234	55	MW470983	123488	SNV	atpF
ptDNA_M3a	ptDNA	ptDNA_M3a_F	GCCAAGCTGTCCAAAGAGC	ptDNA_M3a_R	GCTTCTCTTTTCATTCATGAGTCT	172	55	MW470983	123488	SNV	atpF
ptDNA_M4	ptDNA	ptDNA_M4_F	ACGCCCTCCTATTCCTATGC	ptDNA_M4_R	TGGAGCATAACAGCTTGTGG	239	55	MW470983	145644	SNV
ptDNA_M4a	ptDNA	ptDNA_M4_F	ACGCCCTCCTATTCCTATGC	ptDNA_M4a_R	GCGACAGAGTCAAGGTCGAA	182	55	MW470983	145644	SNV
mtDNA_M1	mtDNA	mtDNA_M1_F	TCAAGATGGATTGCCCCTAC	mtDNA_M1_R	TTGGGAACGCGTATAGGTATG	545	57	Male_Gym109_contig_3	283	SNV
mtDNA_M1a	mtDNA	mtDNA_M1a_F	GTCGCAAATATGCCAAACAC	mtDNA_M1a_R	GACTGGTTATTGGGGGAGGT	192	55	Male_Gym109_contig_3	283	SNV
mtDNA_M2	mtDNA	mtDNA_M2_F	GGAGTCACCGGAACGAGTAG	mtDNA_M2_R	TCAGCTATCTCCCTGGATCG	496	57	Male_Gym109_contig_3	1875	SNV
mtDNA_M2a	mtDNA	mtDNA_M2a_F	CCATCTCCCTCGACAACCTA	mtDNA_M2a_R	GAAAAGCCCCACTATGATCG	207	55	Male_Gym109_contig_3	1875	SNV
mtDNA_M3	mtDNA	mtDNA_M3_F	TATCGTGGAACTGGGAAAGG	mtDNA_M3_R	TCAAAGAGCCAAGATCGATTG	414	55	Male_Gym109_contig_3	29185	SNV
mtDNA_M3a	mtDNA	mtDNA_M3a_F	TGCCCAGAAGTAAAGGTTCA	mtDNA_M3a_R	ATCGAGCCCTTTTCGAAGTT	200	52	Male_Gym109_contig_3	29185	SNV
mtDNA_M4	mtDNA	mtDNA_M4_F	ATTTATCGGGCCATTTAGGG	mtDNA_M4_R	GTCCAGCAACCCTCCATTAG	554	55	Male_Gym109_contig_3	53116	InDel
mtDNA_M4a	mtDNA	mtDNA_M4a_F	TTTCCACTCCGTAGCTCGAT	mtDNA_M4a_R	AGGAGCCGGTGATGAAAGT	199	52	Male_Gym109_contig_3	53116	InDel
Marker names ending with ‘a’ stand for marker versions for the generation of shorter PCR products in the case of low-quality DNA
